# Supplementary material for: The simultaneous recognition mechanism of cations and anions using macrocyclic–iodine structures: insights from dispersion-corrected DFT calculations
Source: Royal Society of Chemistry journal article supplement (doi:10.1039/d0cp04291a), 2020-01-01
Supplement: d0cp04291a4.pdf [file d0cp04291a4.pdf]

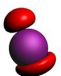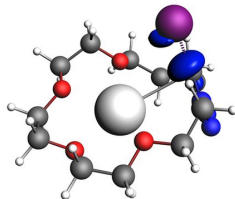

$\Delta\rho_2^*$

$\Delta q_2 = 0.126$  a.u.

$\Delta E_{oi,2} = -1.89$  kcal mol<sup>-1</sup>

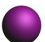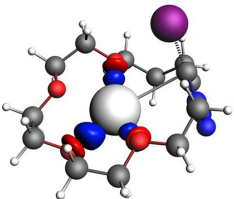

$\Delta\rho_3^*$

$\Delta q_3 = 0.107$  a.u.

$\Delta E_{oi,3} = -2.86$  kcal mol<sup>-1</sup>

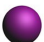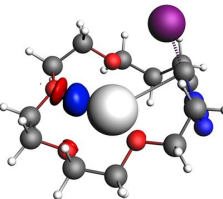

$\Delta\rho_4^*$

$\Delta q_4 = 0.106$  a.u.

$\Delta E_{oi,4} = -2.77$  kcal mol<sup>-1</sup>

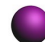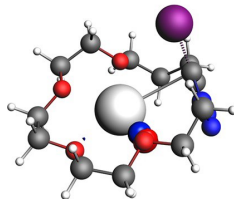

$\Delta\rho_5^*$

$\Delta q_5 = 0.090$  a.u.

$\Delta E_{oi,5} = -2.01$  kcal mol<sup>-1</sup>

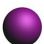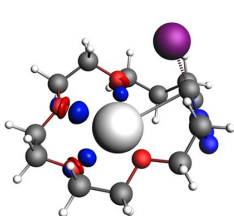

$\Delta\rho_6^*$

$\Delta q_6 = 0.087$  a.u.

$\Delta E_{oi,6} = -2.20$  kcal mol<sup>-1</sup>

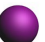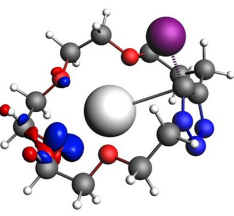

$\Delta\rho_8^{\ominus}$

$\Delta q_8 = 0.062$  a.u.

$\Delta E_{oi,8} = -1.05$  kcal mol<sup>-1</sup>

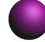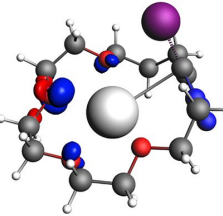

$\Delta\rho_9^{\ominus}$

$\Delta q_9 = 0.057$  a.u.

$\Delta E_{oi,9} = -0.97$  kcal mol<sup>-1</sup>

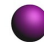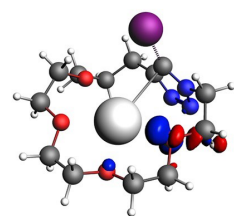

$\Delta\rho_{10}^{\ominus}$

$\Delta q_{10} = 0.051$  a.u.

$\Delta E_{oi,10} = -0.74$  kcal mol<sup>-1</sup>
