# Supplementary material for: The simultaneous recognition mechanism of cations and anions using macrocyclic–iodine structures: insights from dispersion-corrected DFT calculations
Source: Royal Society of Chemistry journal article supplement (doi:10.1039/d0cp04291a), 2020-01-01
Supplement: d0cp04291a7.pdf [file d0cp04291a7.pdf]

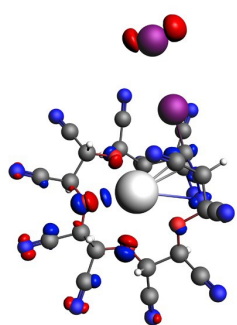

$$\Delta\rho_1^\ominus$$

$$\Delta q_1 = 0.271 \text{ a.u.}$$

$$\Delta E_{oi,1} = -3.41 \text{ kcal mol}^{-1}$$

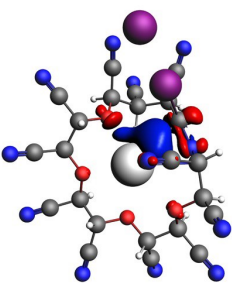

$$\Delta\rho_2^\ominus$$

$$\Delta q_2 = 0.123 \text{ a.u.}$$

$$\Delta E_{oi,2} = -2.83 \text{ kcal mol}^{-1}$$

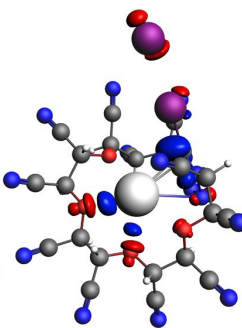

$$\Delta\rho_3^\ominus$$

$$\Delta q_3 = 0.107 \text{ a.u.}$$

$$\Delta E_{oi,3} = -2.38 \text{ kcal mol}^{-1}$$

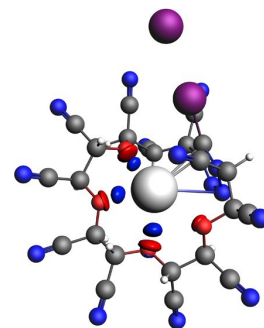

$$\Delta\rho_4^*$$

$$\Delta q_4 = 0.098 \text{ a.u.}$$

$$\Delta E_{oi,4} = -2.56 \text{ kcal mol}^{-1}$$

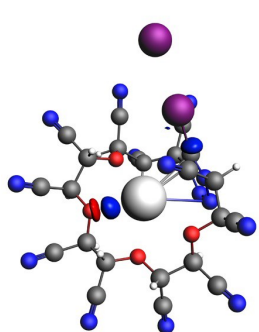

$$\Delta\rho_5^*$$

$$\Delta q_5 = 0.094 \text{ a.u.}$$

$$\Delta E_{oi,5} = -2.06 \text{ kcal mol}^{-1}$$

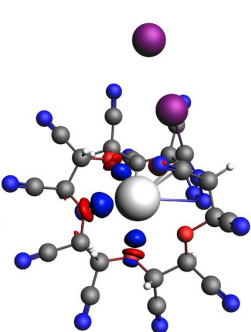

$$\Delta\rho_6^\ominus$$

$$\Delta q_6 = 0.087 \text{ a.u.}$$

$$\Delta E_{oi,6} = -2.04 \text{ kcal mol}^{-1}$$

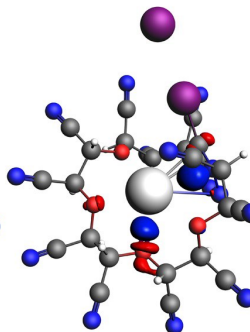

$$\Delta\rho_7^\ominus$$

$$\Delta q_7 = 0.080 \text{ a.u.}$$

$$\Delta E_{oi,7} = -1.65 \text{ kcal mol}^{-1}$$

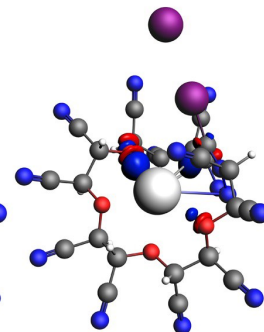

$$\Delta\rho_8^\ominus$$

$$\Delta q_8 = 0.076 \text{ a.u.}$$

$$\Delta E_{oi,8} = -1.79 \text{ kcal mol}^{-1}$$

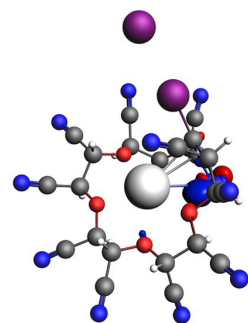

$$\Delta\rho_9^\ominus$$

$$\Delta q_9 = 0.063 \text{ a.u.}$$

$$\Delta E_{oi,9} = -1.09 \text{ kcal mol}^{-1}$$

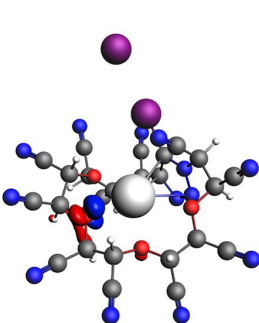

$$\Delta\rho_{11}^\ominus$$

$$\Delta q_{11} = 0.055 \text{ a.u.}$$

$$\Delta E_{oi,11} = -1.03 \text{ kcal mol}^{-1}$$

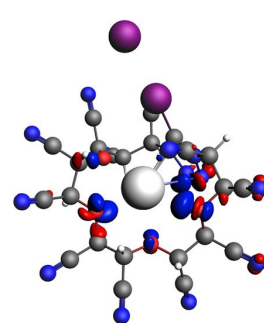

$$\Delta\rho_{12}^d$$

$$\Delta q_{12} = 0.051 \text{ a.u.}$$

$$\Delta E_{oi,12} = -0.90 \text{ kcal mol}^{-1}$$
