# Supplementary figures and images for: The simultaneous recognition mechanism of cations and anions using macrocyclic–iodine structures: insights from dispersion-corrected DFT calculations
Source: Royal Society of Chemistry journal article supplement (doi:10.1039/d0cp04291a), 2020-01-01

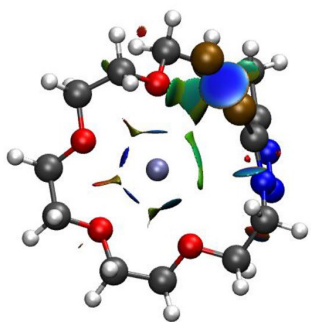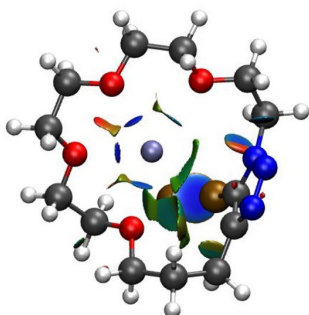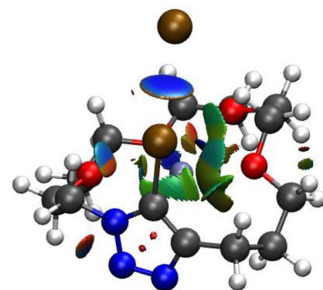

Na-1-I

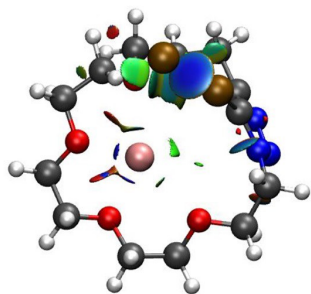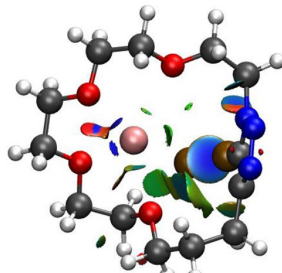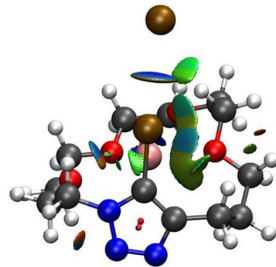

Li-2-I

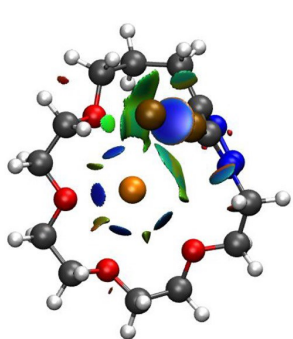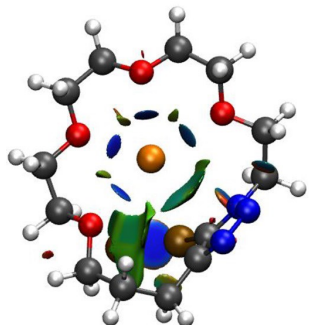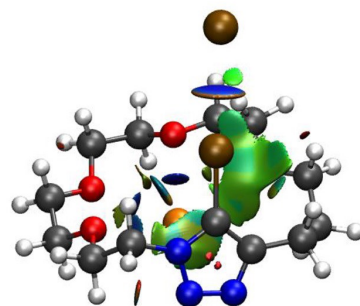

K-3-I

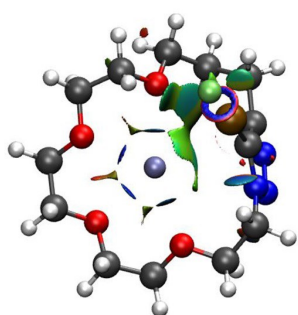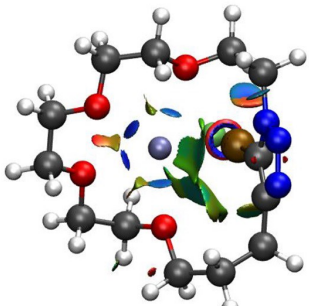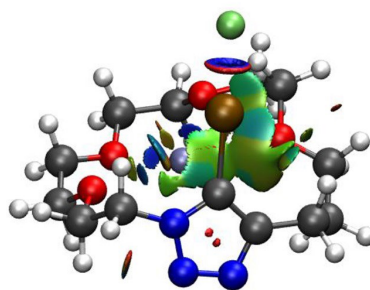

Na-4-F

Supplement: d0cp04291a10.pdf [file d0cp04291a10.pdf]

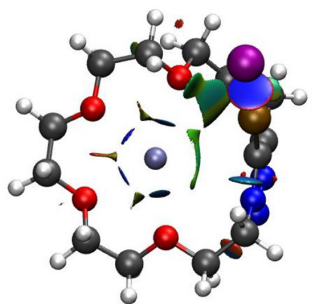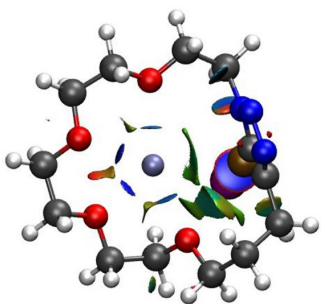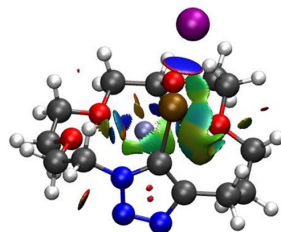

Na-5-Cl

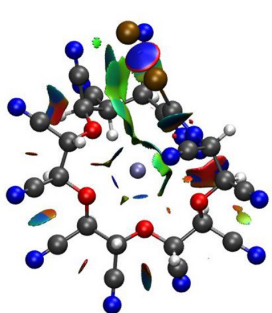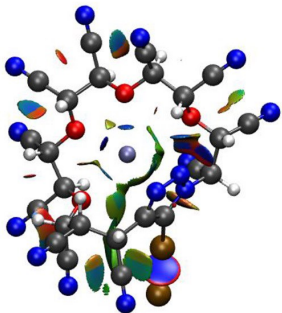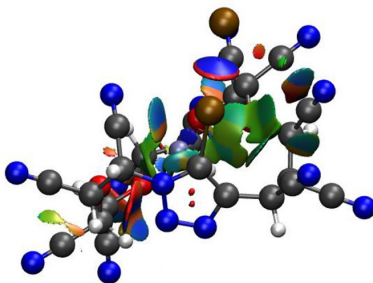

Na-6-I

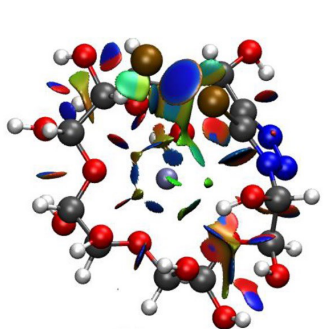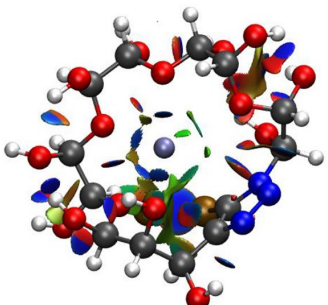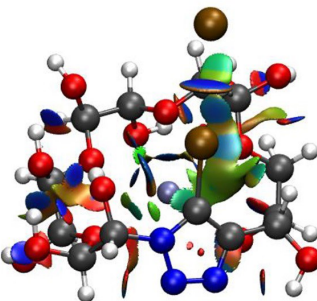

Na-7-I

Supplement: d0cp04291a11.pdf [file d0cp04291a11.pdf]

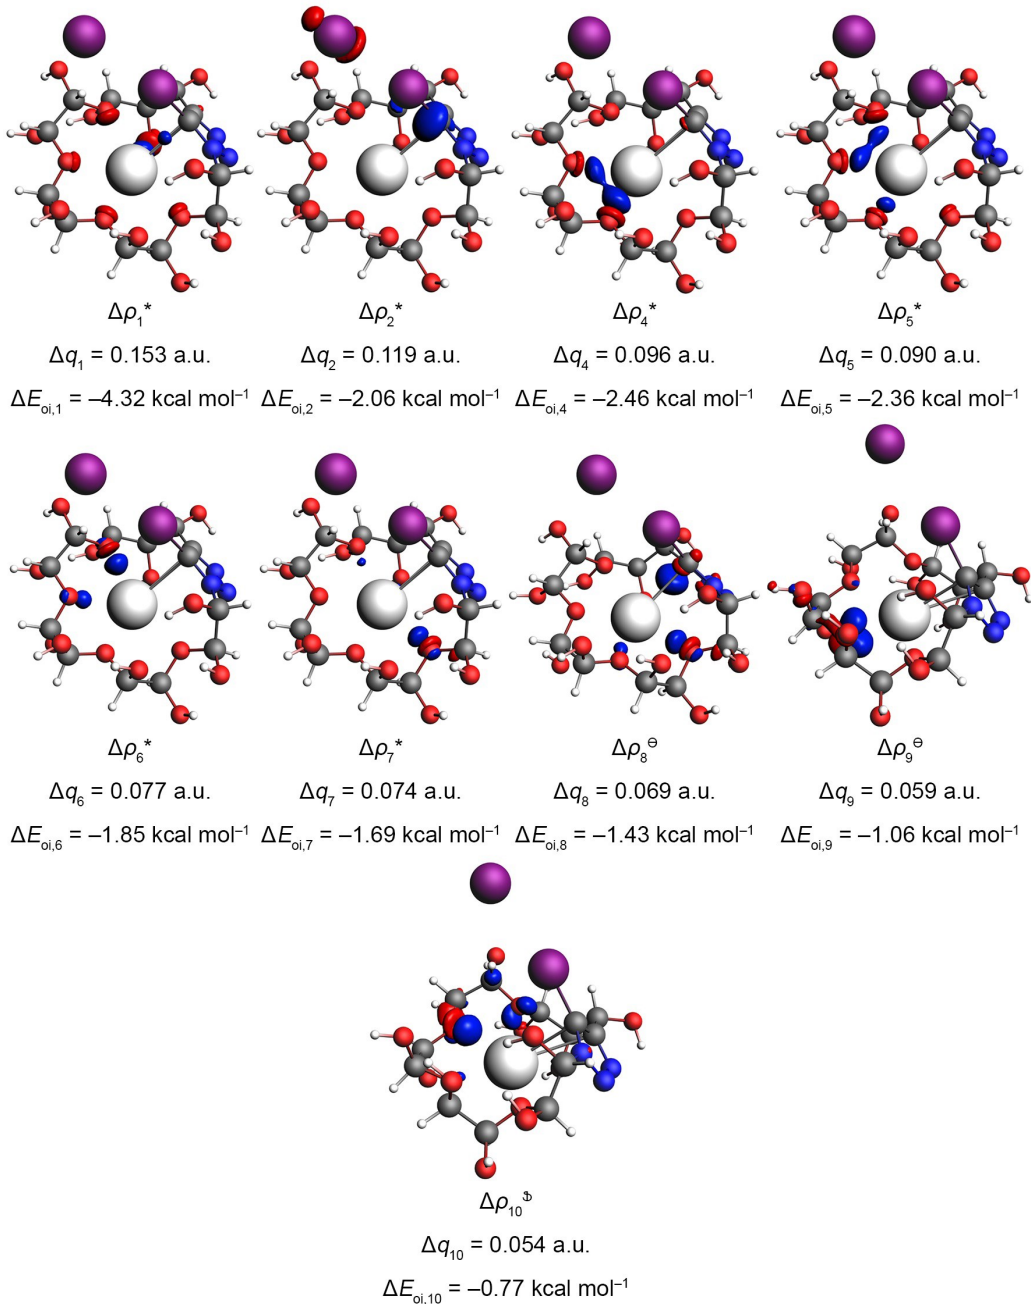

Supplement: d0cp04291a8.pdf [file d0cp04291a8.pdf]

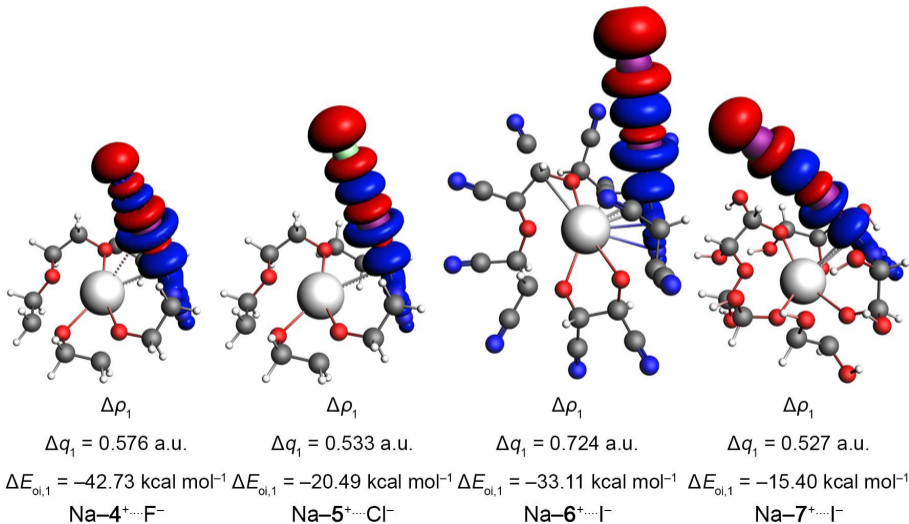

Supplement: d0cp04291a9.pdf [file d0cp04291a9.pdf]
